# Supplementary material for: Crystal structures of benzoxazolyl–copper(iii,ii,i) complexes and investigation of Cu(ii)-mediated aryl carbon–hydrogen bromination
Source: Royal Society of Chemistry journal article supplement (doi:10.1039/c5dt01090j), 2015-01-01
Supplement: c5dt01090j1.pdf [file c5dt01090j1.pdf]

**Crystal Structures of Benzoxazolyl-Copper(III, II, I)  
Complexes and Cu(II)-Mediated Aryl Carbon-Hydrogen  
Bromination**

Lianke Wang, Hongping Zhou\*, Jieying Wu, Yupeng Tian

College of Chemistry and Chemical Engineering, Key Laboratory of Functional Inorganic Materials Chemistry of Anhui Province, Anhui University, Hefei 230601, P. R. China.

\*Tel: +86-551-63861259, Fax: +86-551-63861259. E-mail: [zhpzhp@263.net](mailto:zhpzhp@263.net).

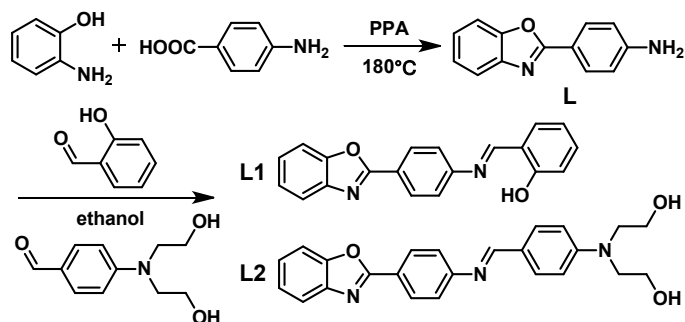

**Scheme S1.** The synthetic routes of ligand L, L1 and L2.

**Table S1.** Selected bond lengths (Å) and angles (°) for 1–3.

| <b>C<sub>26</sub>H<sub>16</sub>Br<sub>7</sub>CuN<sub>4</sub>O<sub>2</sub> (1)</b> |            |                      |           |                    |            |
|-----------------------------------------------------------------------------------|------------|----------------------|-----------|--------------------|------------|
| Br(7)-C(23)                                                                       | 1.896(8)   | Br(5)-C(10)          | 1.906(8)  | Br(4)-C(12)        | 1.907(8)   |
| Br(6)-C(25)                                                                       | 1.898(8)   | Cu(1)-N(1)           | 1.997(6)  | Cu(1)-Br(1)        | 2.3397(15) |
| Cu(1)-Br(2)                                                                       | 2.3707(19) | Cu(1)-Br(3)          | 2.420(2)  | N(1)-Cu(1)-Br(1)   | 151.3(2)   |
| N(1)-Cu(1)-Br(2)                                                                  | 92.05(19)  | Br(1)-Cu(1)-Br(2)    | 96.91(6)  | N(1)-Cu(1)-Br(3)   | 91.1(2)    |
| Br(1)-Cu(1)-Br(3)                                                                 | 96.17(7)   | Br(2)-Cu(1)-Br(3)    | 146.41(7) |                    |            |
| <b>C<sub>13</sub>H<sub>8</sub>Br<sub>3</sub>CuN<sub>2</sub>O (2)</b>              |            |                      |           |                    |            |
| Br(1)-Cu(1)#1                                                                     | 2.392(2)   | Br(1)-Cu(1)          | 2.411(2)  | Br(2)-C(10)        | 1.894(4)   |
| Br(3)-C(12)                                                                       | 1.893(4)   | Cu(1)#1-Br(1)-Cu(1)  | 114.64(7) | N(1)-Cu(1)-Br(1)#2 | 125.07(11) |
| N(1)-Cu(1)-Br(1)                                                                  | 119.82(12) | Br(1)#2-Cu(1)-Br(1)  | 114.64(7) |                    |            |
| <b>C<sub>26</sub>H<sub>18</sub>Br<sub>4</sub>CuN<sub>4</sub>O<sub>2</sub> (3)</b> |            |                      |           |                    |            |
| Cu(1)-N(1)                                                                        | 1.983(7)   | Cu(1)-N(1)#3         | 1.983(7)  | Cu(1)-Br(1)#3      | 2.4266(15) |
| Cu(1)-Br(1)                                                                       | 2.4266(15) | Br(2)-C(10)          | 1.896(9)  | N(1)-Cu(1)-N(1)#3  | 180.000(1) |
| N(1)-Cu(1)-Br(1)#3                                                                | 89.9(2)    | N(1)#3-Cu(1)-Br(1)#3 | 90.1(2)   | N(1)-Cu(1)-Br(1)   | 90.1(2)    |
| N(1)#3-Cu(1)-Br(1)                                                                | 89.9(2)    | Br(1)#3-Cu(1)-Br(1)  | 180.0     |                    |            |

<sup>a</sup>Symmetry transformations used to generate equivalent atoms: #1: x-1, y, z ; #2: x+1, y, z ; #3: -x+2, -y+1, -z+1.

**Table S2.** intermolecular and intramolecular bond lengths (Å) and angles (°) for 1–3.

| D-H...A                                                                           | <i>d</i> (D-H) Å | <i>d</i> (D-A) Å | <i>d</i> (H...A) Å | ∠DHA °        |
|-----------------------------------------------------------------------------------|------------------|------------------|--------------------|---------------|
| <b>C<sub>26</sub>H<sub>16</sub>Br<sub>7</sub>CuN<sub>4</sub>O<sub>2</sub> (1)</b> |                  |                  |                    |               |
| C13-H13...N1                                                                      | 0.930(.008)      | 3.067(.011)      | 2.837(.007)        | 95.41( 0.51)  |
| C26-H26...N3                                                                      | 0.930(.009)      | 2.995(.011)      | 2.731(.007)        | 97.32( 0.56)  |
| C22-H22...O2                                                                      | 0.930(.009)      | 2.784(.010)      | 2.477(.005)        | 99.38( 0.52)  |
| N2-H2A...Br4                                                                      | 0.860(.008)      | 3.075(.008)      | 2.651(.001)        | 111.72( 0.53) |
| N2-H2B...Br5                                                                      | 0.860(.008)      | 3.100(.008)      | 2.665(.001)        | 112.68( 0.52) |
| N4-H4A...Br6                                                                      | 0.860(.008)      | 3.069(.008)      | 2.634(.001)        | 112.64( 0.52) |
| N4-H4B...Br7                                                                      | 0.860(.008)      | 3.092(.008)      | 2.653(.001)        | 112.99( 0.52) |
| C9-H9...O1                                                                        | 0.930(.008)      | 2.770(.010)      | 2.440(.006)        | 100.81( 0.52) |
| N2-H2B...Br1                                                                      | 0.860(.008)      | 3.491(.008)      | 2.732(.001)        | 147.94( 0.53) |
| N2-H2A...Br2                                                                      | 0.860(.008)      | 3.448(.008)      | 2.826(.002)        | 130.60( 0.52) |
| C5-H5...Br1                                                                       | 0.930(.009)      | 3.644(.009)      | 2.825(.001)        | 147.53( 0.54) |
| N4-H4B...Br3                                                                      | 0.860(.008)      | 3.665(.008)      | 2.908(.001)        | 147.91( 0.52) |

| <b>C<sub>13</sub>H<sub>8</sub>Br<sub>3</sub>CuN<sub>2</sub>O (2)</b>              |             |             |             |               |
|-----------------------------------------------------------------------------------|-------------|-------------|-------------|---------------|
| C9-H9...O1                                                                        | 0.930(.004) | 2.724(.006) | 2.380(.003) | 101.62( 0.29) |
| C13-H13...N1                                                                      | 0.930(.004) | 3.051(.006) | 2.804(.004) | 96.40( 0.28)  |
| N2-H2A...Br2                                                                      | 0.860(.004) | 3.080(.004) | 2.649(.001) | 112.31( 0.27) |
| N2-H2B...Br3                                                                      | 0.860(.004) | 3.052(.004) | 2.610(.001) | 113.06( 0.26) |
| C3-H3...O1                                                                        | 0.930(.006) | 3.503(.007) | 2.771(.003) | 136.35( 0.35) |
| N2-H2A...Br3                                                                      | 0.860(.004) | 3.692(.004) | 2.888(.001) | 156.45( 0.26) |
| N2-H2B...Br1                                                                      | 0.860(.004) | 3.805(.007) | 3.045(.003) | 148.49(0.26)  |
| C10-Br2...Br3                                                                     | 1.893(.004) | 4.146(.004) | 3.497(.004) | 95.96(0.27)   |
| <b>C<sub>26</sub>H<sub>18</sub>Br<sub>4</sub>CuN<sub>4</sub>O<sub>2</sub> (3)</b> |             |             |             |               |
| C13-H13...N1                                                                      | 0.930(.009) | 3.029(.013) | 2.766(.008) | 97.39( 0.63)  |
| N2-H2B...Br2                                                                      | 0.860(.008) | 3.092(.010) | 2.664(.002) | 112.13( 0.54) |
| N2-H2A...Br1                                                                      | 0.860(.009) | 3.610(.010) | 2.767(.002) | 166.96( 0.54) |
| C9-H9...O1                                                                        | 0.930(.011) | 2.740(.012) | 2.415(.006) | 100.39( 0.63) |

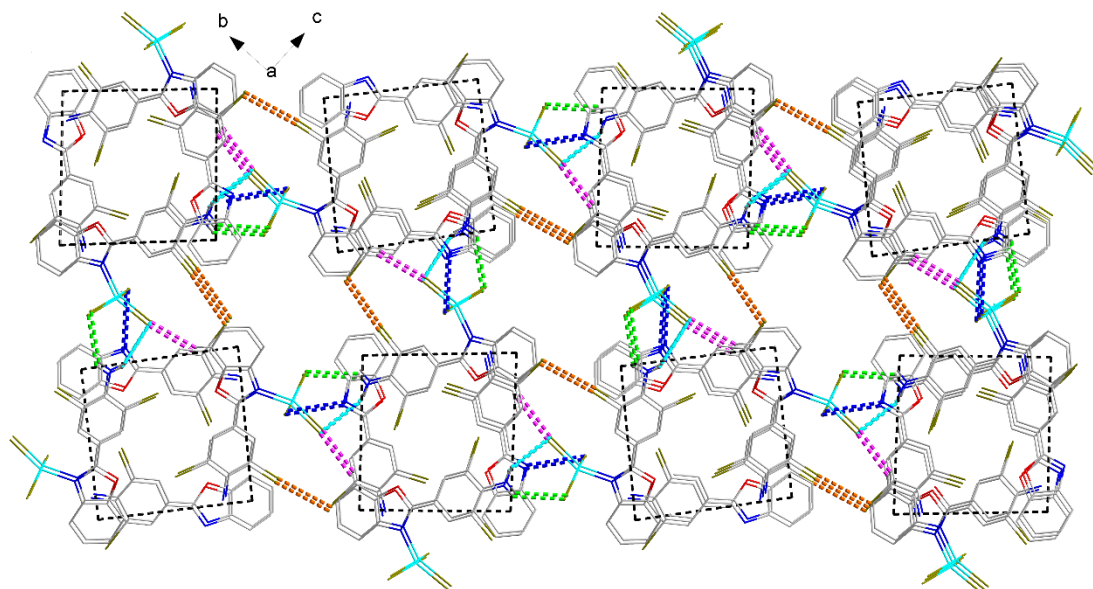

**Figure S1.** The three dimensional latticed supramolecular structure of **1** along the [100] direction. The colored dotted lines represent the weak interactions and hydrogen atoms not participating in hydrogen bonds are omitted for clarity.

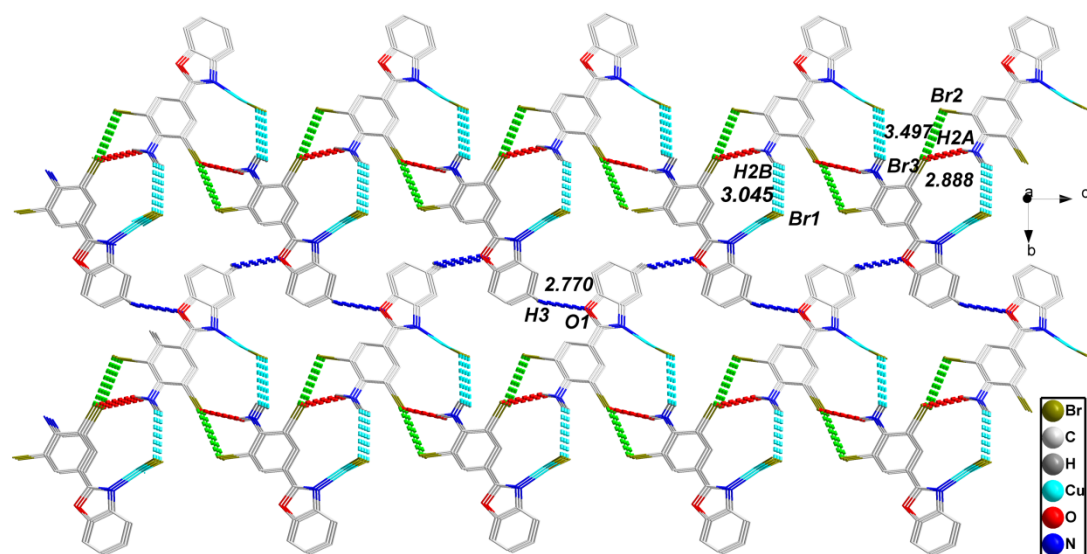

**Figure S2.** The three dimensional network structure of **2** formed by multiple N-H $\cdots$ Br, C-H $\cdots$ O, Br $\cdots$ Br weak interactions. The colored dotted lines represent the weak interactions and hydrogen atoms not participating in hydrogen bonds are omitted for clarity.

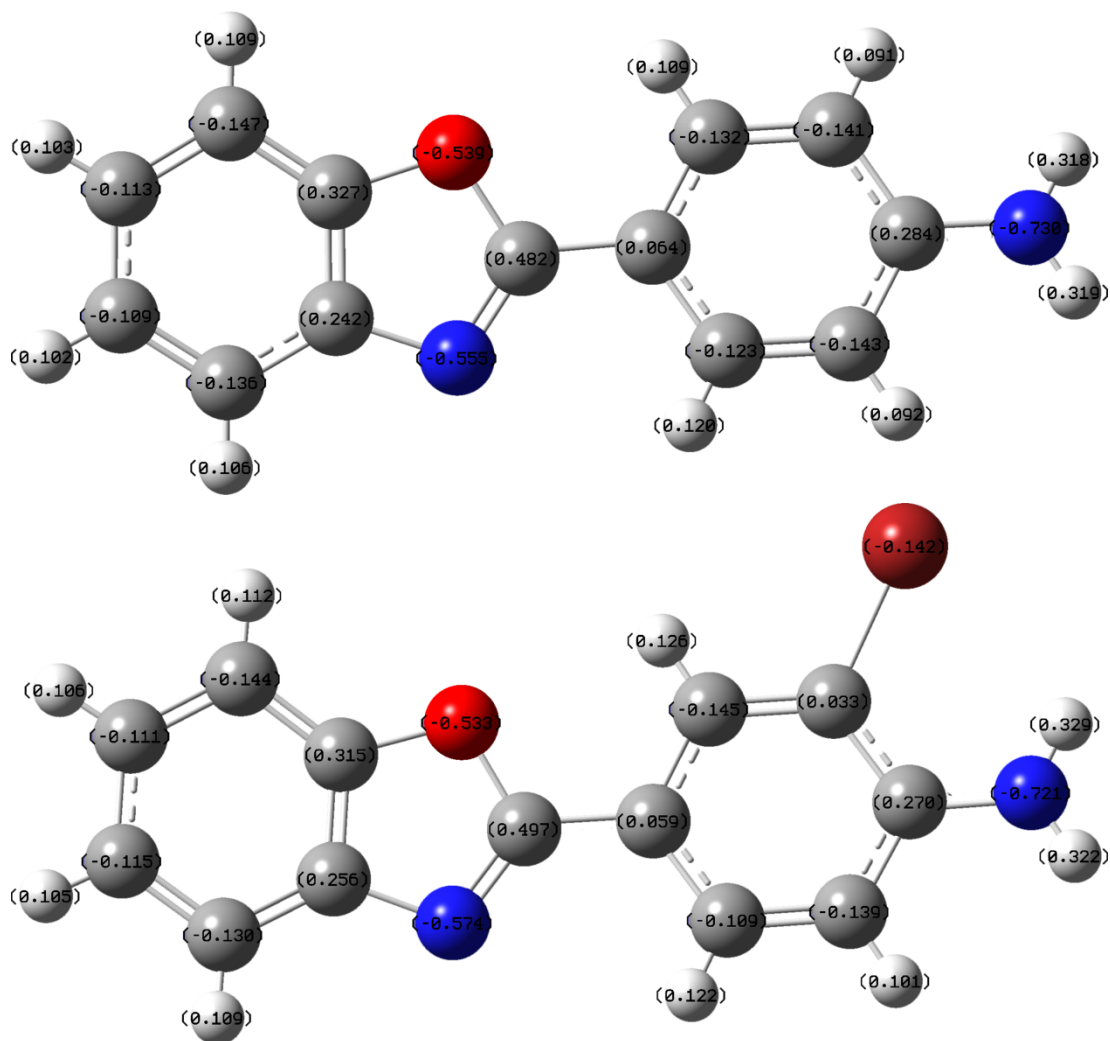

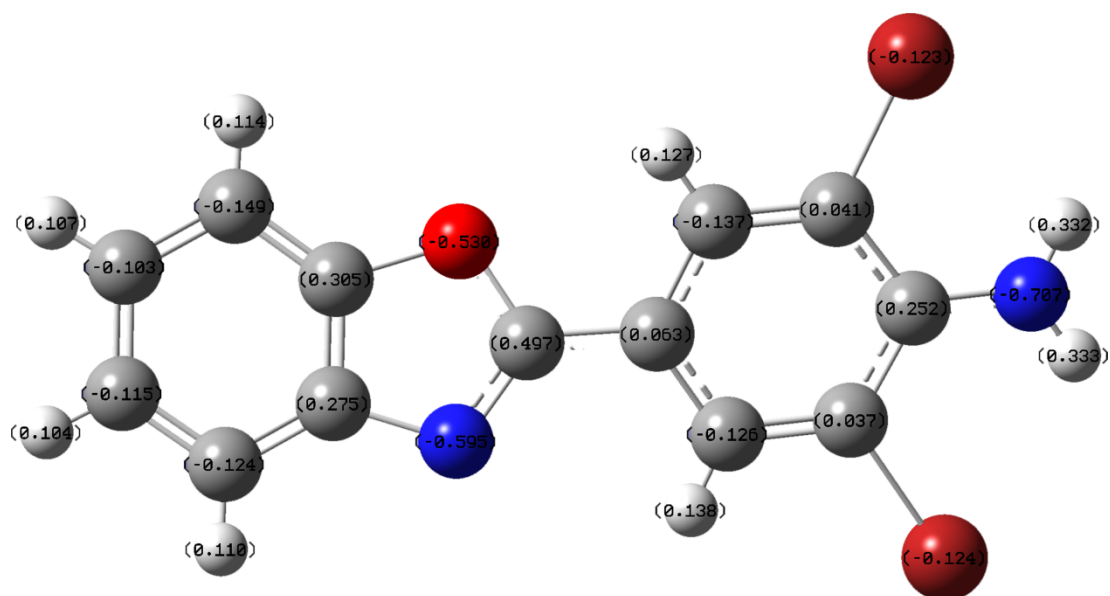

**Figure S3.** The Mulliken charge distribution of atoms in different ligands.

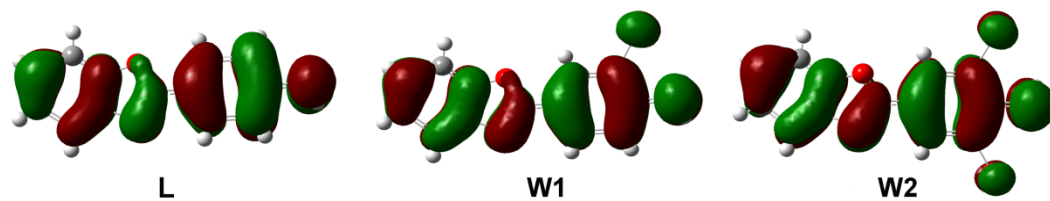

**Figure S4.** The Mulliken charge distribution of different ligands in the ground state.
